# Supplementary material for: An Empirical Investigation into Students’ Actual Use of MOOCs in Saudi Arabia Higher Education
Source: MDPI journal article supplement (doi:10.3390/su15086918), 2023-04-20
Supplement: s1 [file s1]

## Questionnaire

### An empirical investigation into students' actual use of MOOCs at King Saud University

Please indicate with a “√” the extent to which you agree to the given statements in the following table. Note that (1) represents “Strongly Disagree”, (2) “Disagree”, (3) “Neutral”, (4) “Agree” And (5) “Strongly Agree”. There are no correct or incorrect answers.

| <b>Social Engagement</b>    |                                                                                  |   |   |   |   |   |
|-----------------------------|----------------------------------------------------------------------------------|---|---|---|---|---|
| 1                           | I often discussed learning issues with others by use MOOCs.                      | 1 | 2 | 3 | 4 | 5 |
| 2                           | I often shared learning materials or opinions with others by use MOOCs.          | 1 | 2 | 3 | 4 | 5 |
| 3                           | I often talked about learning goals and tasks with others by use MOOCs.          | 1 | 2 | 3 | 4 | 5 |
| 4                           | I rarely answered others' learning questions by using MOOCs.                     | 1 | 2 | 3 | 4 | 5 |
| <b>Social Interaction</b>   |                                                                                  |   |   |   |   |   |
| 1                           | I often discussed learning issues with others course via MOOCs.                  | 1 | 2 | 3 | 4 | 5 |
| 2                           | I often shared learning materials or opinions with others course via MOOCs.      | 1 | 2 | 3 | 4 | 5 |
| 3                           | I often talked about learning goals and tasks with others course via MOOCs.      | 1 | 2 | 3 | 4 | 5 |
| <b>Social Influence</b>     |                                                                                  |   |   |   |   |   |
| 1                           | By using MOOCs, I can stay in touch with peers.                                  | 1 | 2 | 3 | 4 | 5 |
| 2                           | By using MOOCs, I can find more information.                                     | 1 | 2 | 3 | 4 | 5 |
| 3                           | By using MOOCs, I can find new sources from my peers.                            | 1 | 2 | 3 | 4 | 5 |
| 4                           | By using MOOCs, I can gain more knowledge.                                       | 1 | 2 | 3 | 4 | 5 |
| <b>Social Support</b>       |                                                                                  |   |   |   |   |   |
| 1                           | Through MOOCs use, I have a lecturer who encourages me for learning.             | 1 | 2 | 3 | 4 | 5 |
| 2                           | Through MOOCs use, I have a peer who gives me good advice for learning.          | 1 | 2 | 3 | 4 | 5 |
| 3                           | Through MOOCs use, I have a peer who shows me how to do new things for learning. | 1 | 2 | 3 | 4 | 5 |
| <b>Social Identity</b>      |                                                                                  |   |   |   |   |   |
| 1                           | I am a valuable member of courses because I am using MOOCs.                      | 1 | 2 | 3 | 4 | 5 |
| 2                           | Through MOOCs use, I believe that I am one of the course members.                | 1 | 2 | 3 | 4 | 5 |
| 3                           | Through MOOCs use, I am an important member of courses.                          | 1 | 2 | 3 | 4 | 5 |
| <b>Perceived Usefulness</b> |                                                                                  |   |   |   |   |   |
| 1                           | MOOCs helps me get my work done more quickly.                                    | 1 | 2 | 3 | 4 | 5 |

|                                  |                                                                                    |   |   |   |   |   |
|----------------------------------|------------------------------------------------------------------------------------|---|---|---|---|---|
| 2                                | MOOCs is easy to operate.                                                          | 1 | 2 | 3 | 4 | 5 |
| 3                                | MOOCs would make me understand the course materials better.                        | 1 | 2 | 3 | 4 | 5 |
| 4                                | MOOCs would enhance my teamwork with classmates on group assignments.              | 1 | 2 | 3 | 4 | 5 |
| <b>Perceived Service Quality</b> |                                                                                    |   |   |   |   |   |
| 1                                | MOOCs platform provides prompt responses to my request.                            | 1 | 2 | 3 | 4 | 5 |
| 2                                | MOOCs platform provides right solution to my request.                              | 1 | 2 | 3 | 4 | 5 |
| 3                                | The service provided in MOOCs platform attends to individual's personalized needs. | 1 | 2 | 3 | 4 | 5 |
| 4                                | The service provided in MOOCs platform is reliable.                                | 1 | 2 | 3 | 4 | 5 |
| <b>Academic Self-efficacy</b>    |                                                                                    |   |   |   |   |   |
| 1                                | I have the resources necessary by use MOOCs.                                       | 1 | 2 | 3 | 4 | 5 |
| 2                                | I have the knowledge necessary by use MOOCs.                                       | 1 | 2 | 3 | 4 | 5 |
| 3                                | I feel positive about using MOOCs for learning and academic self-efficacy.         | 1 | 2 | 3 | 4 | 5 |
| <b>Learning Engagement</b>       |                                                                                    |   |   |   |   |   |
| 1                                | Using MOOCs would enhance my engagement with others and improve my performance.    | 1 | 2 | 3 | 4 | 5 |
| 2                                | Using MOOCs would enhance my engagement with others and increase my productivity.  | 1 | 2 | 3 | 4 | 5 |
| 3                                | My engagement with MOOCs would be easy and understandable.                         | 1 | 2 | 3 | 4 | 5 |
| 4                                | Using MOOCs is very entertaining and helpful for learning engagement.              | 1 | 2 | 3 | 4 | 5 |
| <b>Learning Persistence</b>      |                                                                                    |   |   |   |   |   |
| 1                                | I feel MOOCs helps me improve my creativity.                                       | 1 | 2 | 3 | 4 | 5 |
| 2                                | I feel MOOCs helps me improve my imagination by obtaining information.             | 1 | 2 | 3 | 4 | 5 |
| 3                                | I feel I can have a variety of experiences without any interference via MOOCs use. | 1 | 2 | 3 | 4 | 5 |
| 4                                | I feel MOOCs is fun regardless of usage purposes.                                  | 1 | 2 | 3 | 4 | 5 |

What is your opinion about the Using MOOCs with your peers in King Saud University? Please leave your comments.
