# Supplementary material for: An Empirical Investigation into Students’ Actual Use of MOOCs in Saudi Arabia Higher Education
Source: MDPI journal article supplement (doi:10.3390/su15086918), 2023-04-20
Supplement: s1 [file s1]

Archive with 1 entries (1 files):
- sustainability-2315676-supplementary.pdf
